# Supplementary material
Source: PubMed Central journal article supplement (PMC3341231)

Supplemental Materials to:

**The p53 isoforms are differentially modified by Mdm2**

Suzanne Camus,<sup>1</sup> Sergio Menéndez,<sup>1</sup> Kenneth Fernandes,<sup>2</sup> Nelly Kua,<sup>1</sup> Geng Liu,<sup>3</sup>  
Dimitris P. Xirodimas,<sup>3</sup> David P. Lane<sup>1</sup> and Jean-Christophe Bourdon<sup>2,\*</sup>

**Figure S1.** Mdm2 interacts with, and promotes variable levels of degradation of, p53 C-terminal mutants. *A*, 1 $\mu$ g WTp53 (lanes 1-4), p53 6KR (lanes 5-8), p53 I332A (lanes 9-12) or p53 C $\Delta$ 60 (lanes 13-16) was expressed in H1299 cells in the absence (lanes 1-2, 5-6, 9-10 and 13-14) or presence (lanes 3-4, 7-8, 11-12 and 15-16) of 4 $\mu$ g co-expressed Mdm2. Three hours prior to harvesting cells were treated or left untreated, as indicated, with 20 $\mu$ M MG132. The upper panel shows whole cell extracts and the lower panel shows a Ni-agarose purification of His<sub>6</sub>-tagged ubiquitinated species.

*B*, 1 $\mu$ g WT p53, p53 I332A or p53 C $\Delta$ 60 was co-expressed with 1 $\mu$ g Mdm2 in duplicate in H1299 cells. Three hours prior to harvesting all cells were treated with MG132. Duplicates were harvested and immunoprecipitated as previously described. Co-immunoprecipitations are shown in the left panel and the inputs in the right panel.

**A**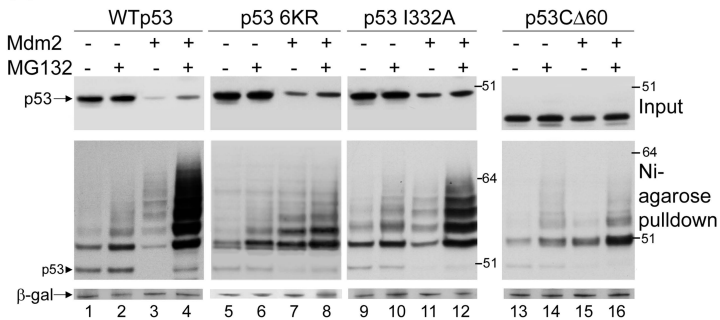**B**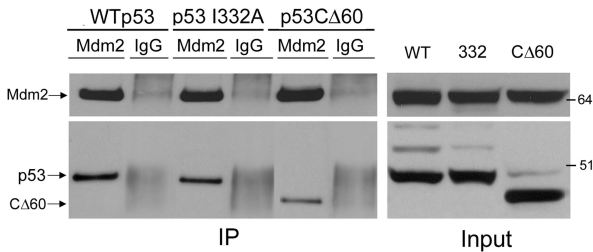

Supplement: cc-11-1646-s1.pdf [file cc-11-1646-s1.pdf]
